# Supplementary material
Source: PubMed Central journal article supplement (PMC3092526)

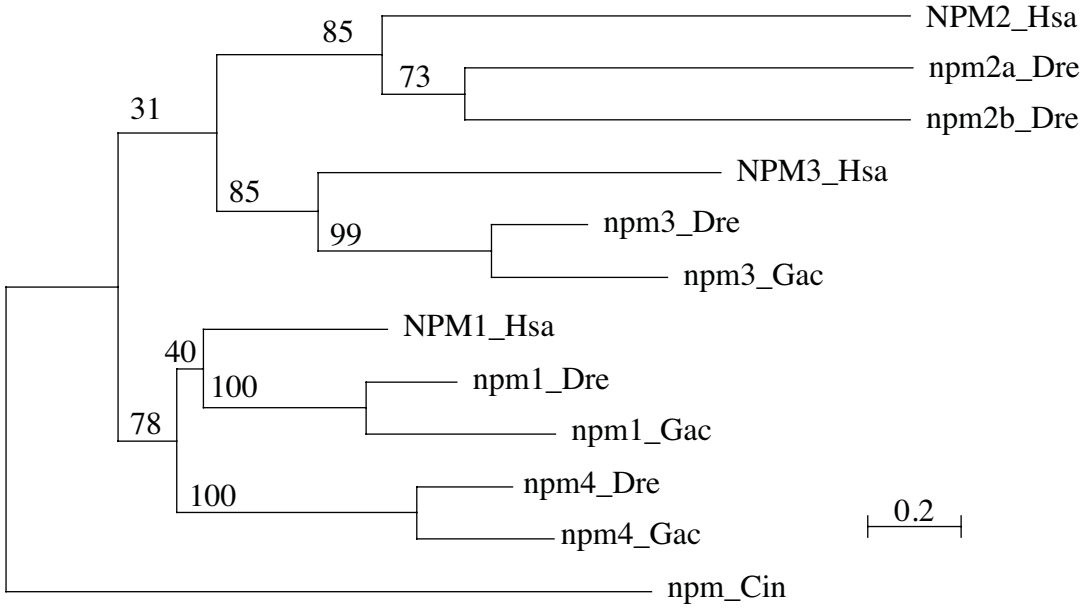

Figure Suppl. 1. Jovelin

Supplement: NIHMS289013-supplement-Supp_Fig_S1.pdf [file NIHMS289013-supplement-Supp_Fig_S1.pdf]

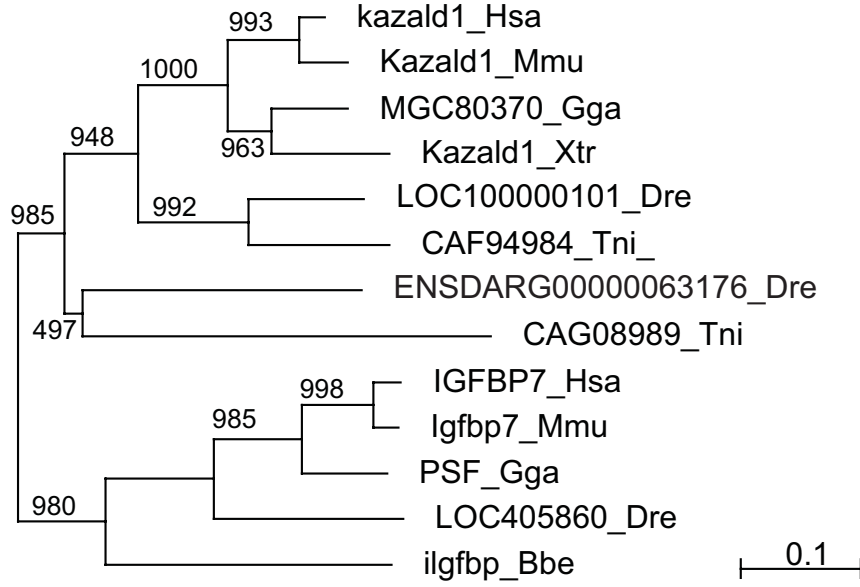

Fig. Suppl. 2 Jovelin

Supplement: NIHMS289013-supplement-Supp_Fig_S2.pdf [file NIHMS289013-supplement-Supp_Fig_S2.pdf]

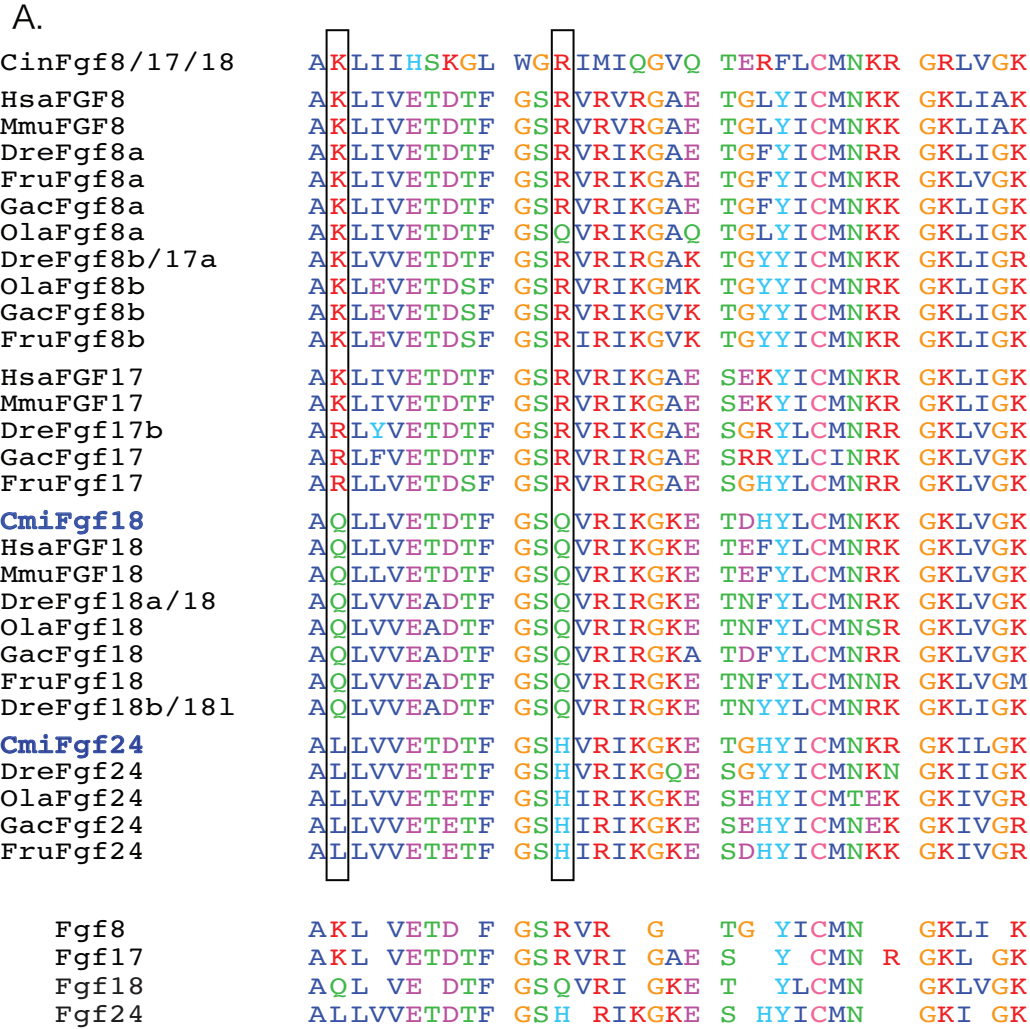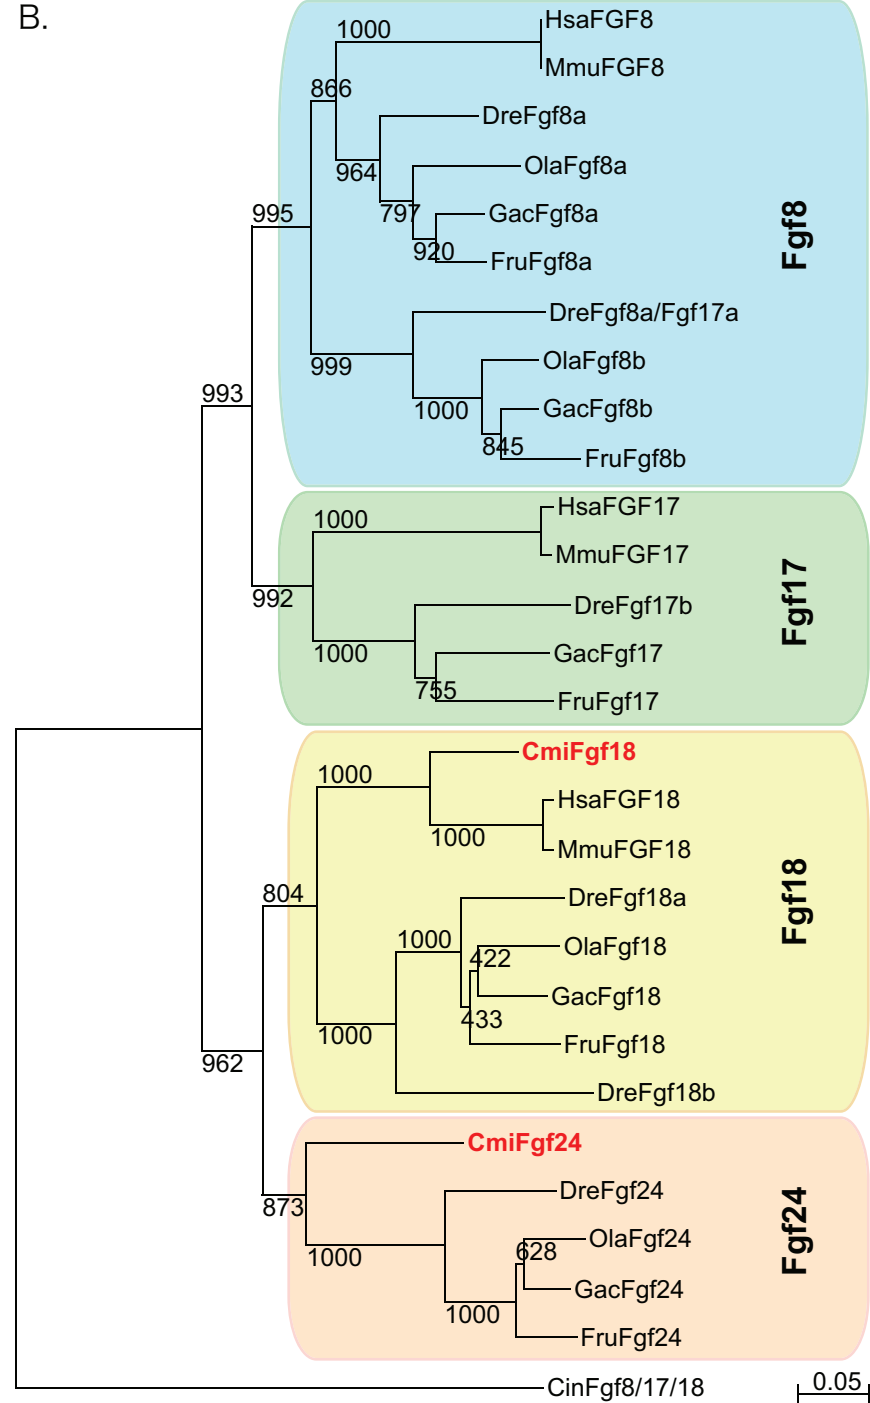

Supplement: NIHMS289013-supplement-Supp_Fig_S3.pdf [file NIHMS289013-supplement-Supp_Fig_S3.pdf]

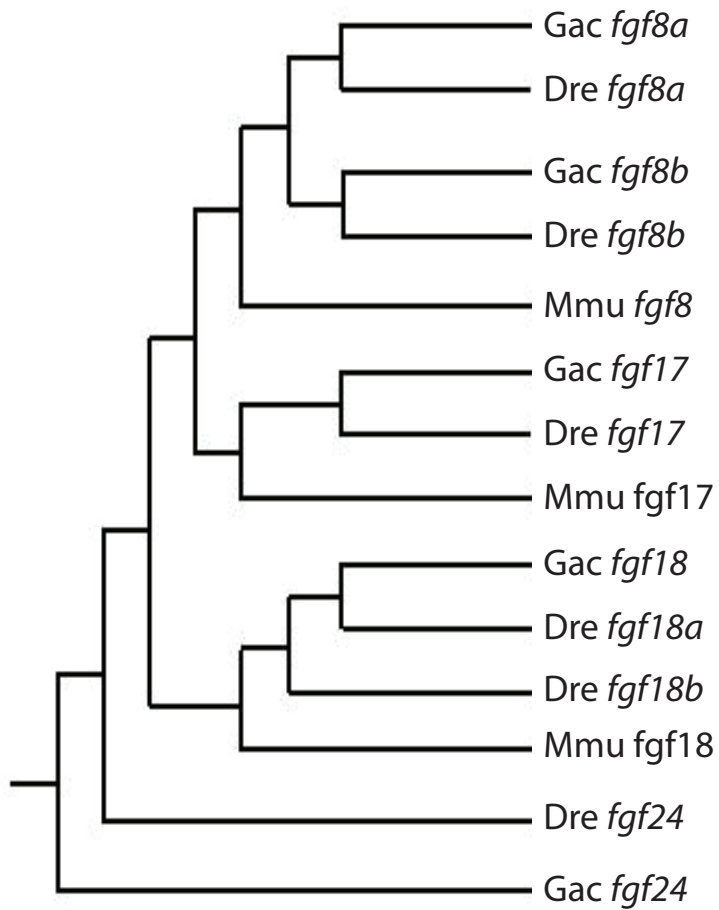

| segmentation |   |   |   |   |   | pharyngula |   |   |   |   |   |   |   |   |   |   |
|--------------|---|---|---|---|---|------------|---|---|---|---|---|---|---|---|---|---|
| d            | m | s | u | s | t | n          | t | r | o | m | h | p | o | a | s | p |
| d            | h |   | m | p | b |            |   |   | e | b |   | a | v | e | p | a |
| +            | + | + |   |   | + | +          | + | + | + | + | + | + | + | + |   |   |
| +            | + | + |   |   | + | +          | + | + | + | + |   | + | + | + |   |   |
|              | + | + |   |   |   |            |   | + |   | + | + |   | + |   |   |   |
|              | + | + |   |   |   |            |   | + |   | + |   |   | + |   |   |   |
| +            | + | + |   |   | + | +          | + | + |   | + | + | + |   | + |   | - |
|              |   | + |   | + |   |            |   | + |   |   |   | + | + |   |   |   |
| +            |   | + |   | + |   |            |   | + |   |   |   | + | + |   |   |   |
| +            | + |   |   |   | + | +          |   |   |   | + |   |   |   |   |   | - |
|              |   |   |   |   |   | +          |   | + |   | + |   | + | + |   | + | + |
|              |   | + |   |   |   | +          |   | + |   |   | + | + | + |   | + | + |
|              | + | + |   |   |   |            |   | + |   | + | + | + | + |   |   |   |
| +            | + | + | + |   |   | -          |   |   |   | + |   | + |   | - |   | + |
| +            |   |   | + |   |   | +          |   | + |   | + |   | + | + | + |   | + |
| +            | + |   | + |   |   | +          |   | + |   | + |   | + | + | + |   | + |

Supplement: NIHMS289013-supplement-Supp_Fig_S4.pdf [file NIHMS289013-supplement-Supp_Fig_S4.pdf]
